# Supplementary material
Source: PubMed Central journal article supplement (PMC2259052)
Supplement: plntphys_pp.107.111351_1.pdf [file plntphys_pp.107.111351_1.pdf]

**Supplementary material**

Video 1: Wilting of a gametophore deposited on a wet filter. The video is associated with Fig. 7A. Time scale: 1s on the video corresponds to 5 min in real time.

Video 2: Wilting of a gametophore deposited on a wet filter. The video is associated with Fig. 7B. Time scale: 1s on the video corresponds to 3 min in real time.

Video 3: Wilting of a gametophore deposited on a dry filter. The video is associated with Fig. 7C. Time scale: 1s on the video corresponds to 1 min in real time.
